# Supplementary material for: The oscillation of intracellular Ca2+ influx associated with the circadian expression of Piezo1 and TRPV4 in the bladder urothelium
Source: PubMed Central journal article supplement (PMC5890282; doi:10.1038/s41598-018-23115-w), 2018-04-09
Supplement: 41598_2018_23115_MOESM1_ESM.pdf [file 41598_2018_23115_MOESM1_ESM.pdf]

**Title;**

**The oscillation of intracellular Ca<sup>2+</sup> influx associated with the circadian expression of *Piezo1* and *TRPV4* in the bladder urothelium.**

Tatsuya Ihara<sup>1</sup>, Takahiko Mitsui<sup>1</sup>, Yuki Nakamura<sup>2</sup>, Mie Kanda<sup>1</sup>, Sachiko Tsuchiya<sup>1</sup>,  
Satoru Kira<sup>1</sup>, Hiroshi Nakagomi<sup>1</sup>, Norifumi Sawada<sup>1</sup>, Manabu Kamiyama<sup>1</sup>, Yuri Hirayama<sup>3</sup>,  
Eiji Shigetomi<sup>3</sup>, Youichi Shinozaki<sup>3</sup>, Mitsuharu Yoshiyama<sup>1</sup>, Atsuhito Nakao<sup>2</sup>, Masayuki  
Takeda<sup>1\*</sup> and Schuichi Koizumi<sup>3\*</sup>

<sup>1</sup>Department of Urology, Interdisciplinary Graduate School of Medicine, University of  
Yamanashi, Chuo, Yamanashi, Japan

<sup>2</sup>Department of Immunology, Interdisciplinary Graduate School of Medicine, University of  
Yamanashi, Chuo, Yamanashi, Japan

<sup>3</sup>Department of Neuropharmacology, Interdisciplinary Graduate School of Medicine,  
University of Yamanashi, Chuo, Yamanashi, Japan

\*Correspondence author:

Schuichi Koizumi

1110 Shimokato, Chuo, Yamanashi, 409-3898 Japan

Tel: +81-55-273-9503

Fax: +81-55-273-6739

E-mail: [skoizumi@yamanashi.ac.jp](mailto:skoizumi@yamanashi.ac.jp)

Masayuki Takeda

1110 Shimokato, Chuo, Yamanashi, 409-3898 Japan

Tel: +81-55-273-9643

Fax: +81-55-273-9659

E-mail: [matakeda@yamanashi.ac.jp](mailto:matakeda@yamanashi.ac.jp)

**Supplementary Figure 1**

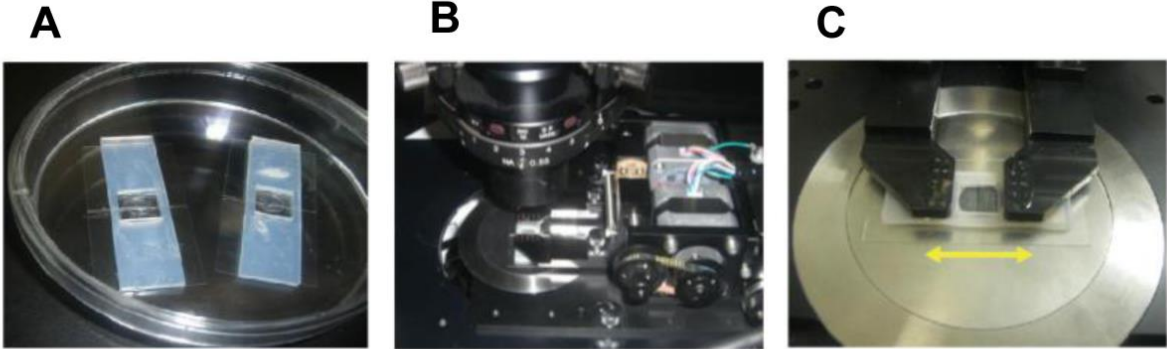

**Supplementary Figure 1. *In vitro* cell stretch system.**

A, Elastic silicone chambers. B and C, The silicone chamber was set in the 2 arms of the extension device on the microscope stage. The arrow in C indicates the direction of extension.
